# Supplementary material for: Rationally heteroarylated pyridines as hole transport materials for OLEDs
Source: Royal Society of Chemistry journal article supplement (doi:10.1039/d3cp01726e), 2023-01-01
Supplement: d3cp01726e1.pdf [file d3cp01726e1.pdf]

## Supporting Information

### Rationally Heteroarylated Pyridines as Hole Transport Materials for OLEDs

Krishan Kumar,<sup>a,\*</sup> Anirban Karmakar,<sup>b</sup> Feng-Rong Chen<sup>c</sup>, Jwo-Huei Jou<sup>c</sup>, Subrata Ghosh,<sup>a</sup>

Subrata Banik,<sup>d,\*</sup> Sunil Kumar,<sup>a,\*</sup>

<sup>a</sup> *School of Chemical Sciences, IIT Mandi, Himachal Pradesh 175005, India.*

<sup>b</sup> *Centro de Química Estrutural, Instituto Superior Técnico, Avenida Rovisco Pais, 1049-001,*

*Lisboa, Portugal*

<sup>c</sup> *Department of Materials Science and Engineering, National Tsing Hua University 101, Sec.*

*2, Guang-Fu Road, Hsinchu 30013, Taiwan, R.O.C.*

<sup>d</sup> *Department of Chemistry, School of Chemical and Biotechnology, SASTRA Deemed*

*University, Thanjavur 613401, Tamil Nadu, India.*

*Corresponding Authors:*

*K.Kumar, Email: [krishanme906@gmail.com](mailto:krishanme906@gmail.com)*

*S. Banik, Email: [subratachem@gmail.com](mailto:subratachem@gmail.com)*

*S. Kumar, Email: [chemsunil85@gmail.com](mailto:chemsunil85@gmail.com)*

## General

All the synthesized molecules were characterised by NMR on a Jeol EXC NMR spectrometer. The optical properties such as UV-vis absorption and photoluminescence spectrum were recorded in Shimadzu UV-2450 and Carry Eclips Fluorescence Spectrometer, Agilent technologies, respectively. HRMS-ESI spectra of all the compounds were measured on Bruker Maxix Impact HD instrument and theoretical mass values were calculated from compass isotope pattern software. All the photophysical studies were performed in HPLC-grade solvents. The TGA and DSC analysis was investigated on NETZSCH STA448 F1 JUPITOR and (Perkin Elmer DSC 8000) instruments under a nitrogen and argon atmosphere, respectively, with a 10 °C/minute heating rate. Diffraction studies of **PrPzPy** were performed on an Agilent Technologies X-ray diffractometer (Rigaku corporations). The electrochemical properties of the molecules were measured by Cyclic Voltammetry on Metrohm Auto lab using three-electrode systems (Ag/AgCl, Pt-disc, and Pt-wire) in tetrabutylammonium hexafluorophosphate electrolyte, and DCM as solvent. For the photoluminescence study of the molecules, 1mg/ml stock solution was prepared in DCM solvent and experiments were done in 5 nm and 5nm slits for excitation and emission respectively. The excitation wavelength for **PrPzPy** and **MePzCzPy** was 330, and 338 nm, and photoluminescence and absorption studies were done using 10µM DCM. The compound **EtCz** was synthesized following a previous report.<sup>[1]</sup>

## 1. Experimental Section:

### *Procedure for the synthesis of MePz [2]*

NaH (1.5 eq.) and DMF (10 ml) were placed in a 100-ml two-neck round bottomed flask, then phenothiazine (1.0 eq.) was added to the RB. The mixture was stirred for 40 minutes at room temperature, then iodomethane (1.1 eq.) was added dropwise. The mixture was stirred for 6h at room temperature. The crude product was poured into the ice-water and extracted with DCM. The organic layer was evaporated on rota-evaporator and the crude product was purified by column chromatography with 3% ethyl acetate-hexane as the eluent; White solid; Yield: 80%;  $^1\text{H}$  NMR (500 MHz,  $\text{CDCl}_3$ ): 7.24-7.13 (m, 4H), 6.92 (t,  $J = 7.55$  Hz, 2H), 6.81 (d,  $J = 8.25$  Hz, 2H);  $^{13}\text{C}$  NMR (125 MHz,  $\text{CDCl}_3$ ): 145.78, 127.39, 127.11, 123.33, 122.41, 114.03, 35.26.

### *Procedure for the synthesis of PrPz [2]*

NaH (1.5 eq.) and DMF (10 ml) were placed in a 100-ml two-necked round bottomed flask, then phenothiazine (1.0 eq.) was added to the RB. The mixture was stirred for 40 minutes at room temperature, then iodopropane (1.1 eq.) was added dropwise. The mixture was stirred for 6h at room temperature. The crude product was poured into the ice-water and extracted with DCM. The organic layer was evaporated on rota-evaporator and the crude product was purified by column chromatography with 2% ethyl acetate-hexane as the eluent; Oily compound was obtained which become yellow solid after some time; Yield: 75%;  $^1\text{H}$  NMR (500 MHz,  $\text{CDCl}_3$ ): 7.35-7.30 (m, 4H), 7.08 (t,  $J = 7.55$  Hz, 2H), 7.00 (d,  $J = 7.55$  Hz, 2H), 3.92 (t,  $J = 6.15$  Hz, 2H), 1.99-1.95 (m, 2H), 1.16 (t,  $J = 7.55$  Hz, 3H);  $^{13}\text{C}$  NMR (125 MHz,  $\text{CDCl}_3$ ): 144.98, 127.09, 126.92, 124.60, 122.04, 115.19, 48.71, 19.82, 11.10.

### *Synthetic Procedure for MePzCHO [3]*

A mixture of 10-methyl-10*H*-phenothiazine (1 eq.), POCl<sub>3</sub> (1.5 eq.), and DMF (2 eq.) in RB was stirred at room temperature for 1h. After that, the reaction mixture was refluxed at 95 °C for 12h. Then the reaction mixture was quenched with aq. solution of NaHCO<sub>3</sub> and extracted with DCM. The organic solvent was evaporated using rota-evaporator and the crude solid was purified by column chromatography with 8% ethyl acetate-hexane as the eluent; Yellow solid; Yield: 50%; <sup>1</sup>H NMR (500 MHz, CDCl<sub>3</sub>): 9.73 (s, 1H), 7.58-7.55 (m, 1H), 7.50-7.50 (m, 1H), 7.15-7.12 (m, 1H), 7.07-7.05 (m, 1H), 6.95-6.94 (m, 1H), 6.78-6.74 (m, 2H), 3.33 (s, 3H); <sup>13</sup>C NMR (125 MHz, CDCl<sub>3</sub>): 189.92, 150.75, 143.76, 130.83, 130.33, 127.60, 127.56, 127.02, 123.58, 123.41, 122.16, 114.61, 113.50, 35.58.

*Synthetic Procedure for PrPzCHO* [3]

A mixture of 10-propyl-10*H*-phenothiazine (1 eq.), POCl<sub>3</sub> (1.5 eq.), and DMF (2 eq.) in RB was stirred at room temperature for 1h. After that, the reaction mixture was refluxed at 95 °C for 12h. Then the reaction mixture was quenched with aq. solution of NaHCO<sub>3</sub> and extracted with DCM. The organic solvent was evaporated using rota-evaporator and the crude solid was purified by column chromatography with 6% ethyl acetate-hexane as the eluent; Oily compound was obtained; Yield: 55%; <sup>1</sup>H NMR (500 MHz, CDCl<sub>3</sub>): 9.74 (s, 1H), 7.59-7.57 (m, 1H), 7.52-7.52 (m, 1H), 7.15-7.11 (m, 1H), 7.07-7.05 (m, 1H), 6.94-6.91 (m, 1H), 6.84-6.82 (m, 2H), 3.80 (t, *J* = 7.55 Hz, 2H), 1.82-1.77 (m, 2H), 0.99 (t, *J* = 7.55 Hz, 3H); <sup>13</sup>C NMR (125 MHz, CDCl<sub>3</sub>): 189.86, 150.50, 143.14, 130.77, 129.97, 128.07, 127.41, 127.34, 124.71, 123.49, 123.39, 115.83, 114.62, 49.47, 19.82, 11.06.

*Synthetic Procedure for EtCzAc* [4]

To a solution of 9-ethyl-9*H*-carbazole (1eq.) in 20 ml dichloromethane was added AlCl<sub>3</sub> (3.5 eq.) and acetyl chloride (2 eq.). The reaction mixture was stirred at room temperature for 6 hours, and then poured into 20 ml diluted HCl ice water. The organic phase was collected, dried over anhydrous Na<sub>2</sub>SO<sub>4</sub>, and concentrated in vacuum. The crude product was purified by

column chromatography (10% ethyl acetate/ hexane) to afford desired product as a white solid. Yield: 70%. <sup>1</sup>H NMR (500 MHz, DMSO-*d*<sub>6</sub>): 8.86 (s, 1H), 8.30 (d, *J*= 8.25 Hz, 1H), 8.07 (d, *J*= 8.95 Hz, 1H), 7.65 (t, *J*= 7.55 Hz, 1H), 4.45 (q, *J*= 7.60 Hz, 2H), 2.67 (s, 3H), 1.30 (t, *J*= 6.85 Hz, 3H); <sup>13</sup>C NMR (125 MHz, DMSO-*d*<sub>6</sub>): 196.97, 142.17, 140.27, 128.37, 126.45, 126.02, 122.55, 122.04, 121.89, 120.80, 119.76, 109.66, 108.82, 37.22, 26.68, 13.69.

#### *Synthetic Procedure for PrPzPy* [4]

A mixture of 4-methoxyacetophenone (3 eq.), 10-propyl-10*H*-phenothiazine-3-carbaldehyde (1 eq.), ammonium acetate (8 eq.) and AcOH (20 ml) in 100 ml RB was refluxed at 130 °C for 12h. Then the reaction mixture was quenched with water and extracted with DCM. The organic solvent was evaporated using rota-evaporator and the crude solid was purified by column chromatography with 8% ethyl acetate-hexane as the eluent; Yellow solid; Yield: 48%; <sup>1</sup>H NMR (500 MHz, DMSO-*d*<sub>6</sub>): 8.28 (d, *J*= 8.95 Hz, 4H), 7.99 (s, 2H), 7.83-7.82 (m, 2H), 7.20-7.16 (m, 2H), 7.10-7.08 (m, 5H), 7.06-7.03 (m, 1H), 7.01-6.96 (m, 1H), 3.87 (t, *J*= 6.85 Hz, 2H), 3.83 (s, 6H), 1.76-1.69 (m, 2H), 0.95 (t, *J*= 6.90 Hz, 3H); <sup>13</sup>C NMR (125 MHz, DMSO-*d*<sub>6</sub>): 160.12, 155.89, 147.82, 145.42, 144.16, 131.76, 131.43, 128.13, 127.56, 127.04, 126.37, 125.50, 124.19, 123.06, 122.58, 115.82, 115.79, 114.00, 113.88, 55.13, 55.11, 48.22, 19.43, 10.86; HRMS (ESI): Calculated for C<sub>34</sub>H<sub>30</sub>N<sub>2</sub>O<sub>2</sub>S [M+H]<sup>+</sup>: 531.2101, found: 531.2101, Melting Point: 141 °C.

#### *Synthetic Procedure for MePzCzPy* [5]

A mixture of 1-(9-ethyl-9*H*-carbazol-3-yl)ethan-1-one (3 eq.), 10-methyl-10*H*-phenothiazine-3-carbaldehyde (1 eq.), ammonium acetate (8 eq.) and AcOH (20 ml) in 100 ml RB was refluxed at 130 °C for 12h. Then the reaction mixture was quenched with water and extracted with DCM. The organic solvent was evaporated using rota-evaporator and the crude solid was purified by column chromatography with 6% ethyl acetate-hexane as the eluent; Yellow color

solid; Yield 35%;  $^1\text{H}$  NMR (500 MHz,  $\text{CDCl}_3$ ): 8.95 (s, 2H), 8.42 (d,  $J = 8.20$  Hz, 2H), 8.27 (d,  $J = 7.55$  Hz, 2H), 7.89 (s, 2H), 7.64 (d,  $J = 6.15$  Hz, 2H), 7.53-7.42 (m, 6H), 7.30-7.19 (m, 4H), 6.98-6.91 (m, 2H), 6.85 (d,  $J = 8.25$  Hz, 1H), 4.41 (q,  $J = 6.90$  Hz, 4H), 3.41 (s, 3H), 1.47 (t,  $J = 6.9$  Hz, 6H);  $^{13}\text{C}$  NMR (125 MHz,  $\text{CDCl}_3$ ): 158.29, 148.53, 146.37, 145.31, 140.60, 140.43, 133.59, 130.97, 127.61, 127.24, 126.35, 125.74, 125.57, 125.31, 124.10, 123.37, 123.29, 122.80, 122.76, 120.75, 119.35, 119.03, 115.17, 114.36, 114.23, 108.60, 108.51, 37.68, 35.43, 13.85; HRMS (ESI): Calculated for  $\text{C}_{46}\text{H}_{36}\text{N}_4\text{S}$   $[\text{M}+\text{H}]^+$ : 677.2730, found: 677.2730, Melting Point: 210 °C.

### 1.1 Hole-only device fabrication for **PrPzPy** compound.

The hole-only device (HOD) with **PrPzPy** was fabricated to evaluate the change in current density with the enhancement in operating voltage. The developed device contained two electrodes i.e. (i) anode, which contained an indium tin oxide (ITO) glass of ~125 nm thickness, and (ii) cathode, which contained aluminum (Al) of ~100 nm thickness, respectively. The hole was injected by a hole injection layer i.e. poly(3,4-ethylenedioxythiophene): polystyrene sulphonate (PEDOT:PSS) with a thickness of ~40 nm. The charge carrier hole was then transported by a hole transport layer (HTL) comprised of **PrPzPy** that had a thickness of ~10 nm. Similarly, the electron was injected by the electron injection layer (EIL) i.e. lithium fluoride (LiF) which had a thickness of ~1 nm. Initially, the ITO-coated glass substrate was properly washed in acetone at 45°C for 30 minutes, followed by washing in 2-propanol at 60 °C for 60 mins (both under an ultrasonic bath), and then it was carefully treated in an ozone atmosphere under ultraviolet light for 15 minutes. After that, the substrate was shifted into a nitrogen-filled glove box for spin-coating the HIL and HTL. The HIL was spin-coated at 4,000 rpm for 20 seconds. The **PrPzPy** was dissolved in toluene and then spin-coated onto the specimen at 2,500 rpm for 20 seconds to coat the HTL. After coating the HTL, the specimen was shifted into a high-vacuum chamber with a base pressure of  $\sim 1 \times 10^{-7}$  torr for sequential

deposition of EIL and cathode via thermal evaporation. The current density of the developed device was measured with a Keithley 2400 electrometer.

## 2. TD spectrum

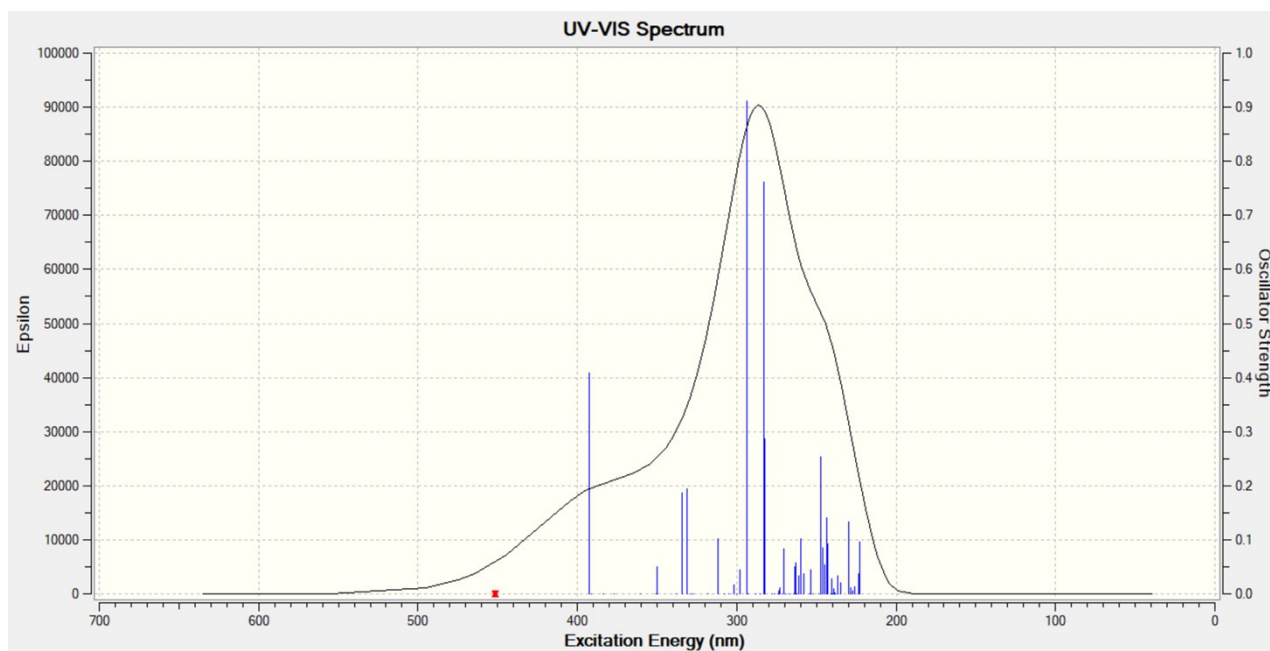

**Fig. S1.** TD Spectrum of PrPzPy

Table S1. TD-DFT analysis of **PrPzPy** (transition, oscillator strength, and energy) with B3LYP functional. MO number 140 corresponds to HOMO and 141 corresponds to LUMO. Transitions with oscillator strengths and coefficients greater than 0.10 are tabulated.

| S.No. | Transition<br>Energy/Wavelength | Nature of transitions               |                               | oscillator strength (f) |
|-------|---------------------------------|-------------------------------------|-------------------------------|-------------------------|
|       |                                 | MOs involved                        | Coefficients                  |                         |
| 1.    | 3.1564 eV 92.81 nm              | 140 ->141                           | 0.68011                       | f=0.4080                |
| 2.    | 3.7056 eV 334.59 nm             | 139 ->141                           | 0.47978                       | f=0.1865                |
| 3.    | 3.7433 eV 331.22 nm             | 139 ->141<br>140 ->142<br>140 ->143 | 0.43778<br>0.26124<br>0.45651 | f=0.1947                |
| 4.    | 4.2262eV 293.37 nm              | 137 ->141<br>139 ->142              | 0.24986<br>0.51084            | f=0.9104                |
| 5     | 4.3766 eV 283.29 nm             | 137 ->141<br>138 ->142              | 0.16940<br>0.66081            | f=0.7622                |
| 6     | 4.3931eV 282.23 nm              | 137 ->141<br>138 ->141              | 0.52141<br>0.15468            | f=0.2861                |
| 7.    | 5.0070 eV 247.62 nm             | 137 ->143<br>138 ->143              | 0.38740<br>0.36615            | f=0.2531                |



|     |                     |                                                  |                                          |          |
|-----|---------------------|--------------------------------------------------|------------------------------------------|----------|
| 8.  | 5.0096 eV 247.50 nm | 137 ->143<br>138 ->143<br>139 ->144<br>139 ->145 | 0.26203<br>0.14315<br>0.22506<br>0.55289 | f=0.1124 |
| 9.  | 5.0892 eV 243.62 nm | 134 ->141<br>135 ->141<br>137 ->144<br>138 ->146 | 0.38023<br>0.26471<br>0.10913<br>0.16874 | f=0.1410 |
| 10. | 5.3913 eV 229.97 nm | 139 ->148                                        | 0.63261                                  | f=0.1332 |

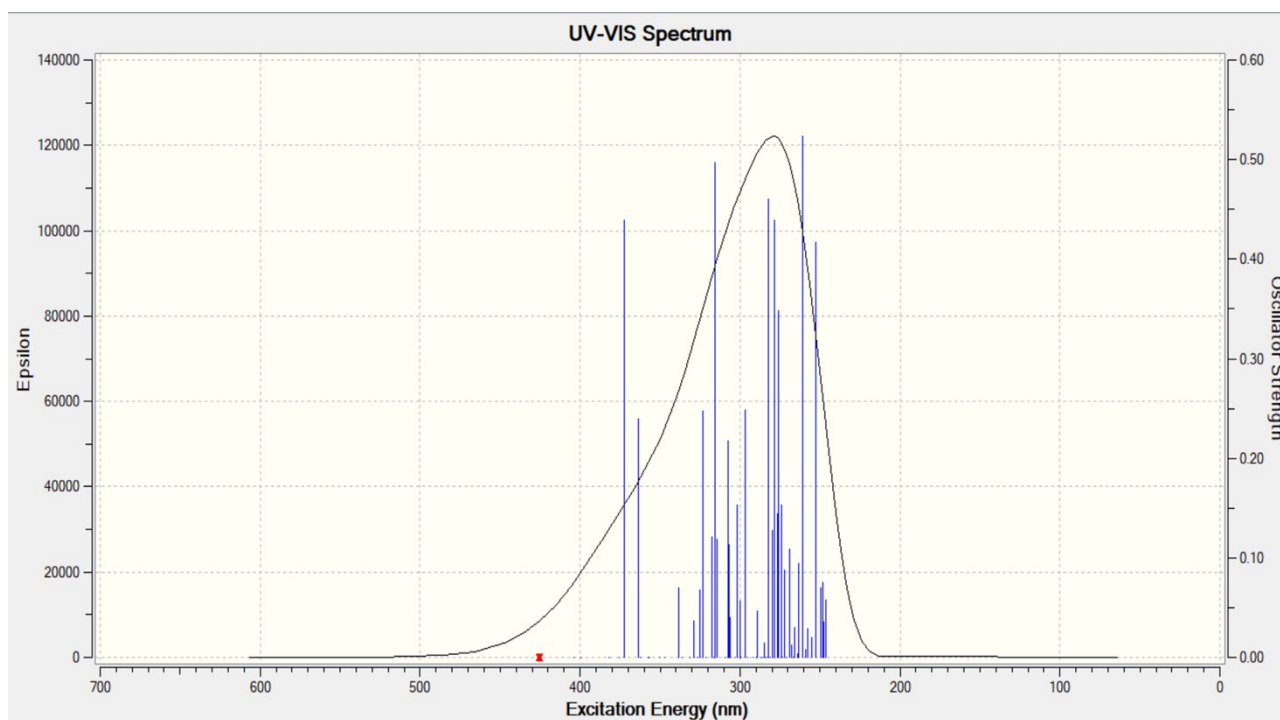

**Fig. S2.** TD Spectrum of MePzCzPy with B3LYP functional

**Table S2.** TD-DFT analysis of **MePzCzPy** (transition, oscillator strength, and energy) with B3LYP functional. MO number 178 corresponds to HOMO and 179 corresponds to LUMO. Transitions with oscillator strengths and coefficients greater than 0.10 are tabulated.

| S.No. | Transition<br>Energy/Wavelength | Nature of transitions                  |                               | oscillator strength (f) |
|-------|---------------------------------|----------------------------------------|-------------------------------|-------------------------|
|       |                                 | MOs involved                           | Coefficients                  |                         |
| 1.    | 3.3276 eV 372.59 nm             | 178 -> 179                             | 0.67474                       | f=0.4396                |
| 2.    | 3.4132eV 363.25 nm              | 177 -> 179                             | 0.68860                       | f=0.2394                |
| 3.    | 3.8364 eV 323.18 nm             | 175 -> 179<br>177 -> 181<br>177 -> 182 | 0.23000<br>0.17683<br>0.43000 | f=0.2477                |
| 4.    | 3.9283 eV 315.62 nm             | 176 -> 182<br>177 -> 180<br>177 -> 182 | 0.18560<br>0.45804<br>0.13002 | f=0.4964                |
| 5.    | 4.0314 eV 307.55 nm             | 175 -> 179<br>176 -> 180<br>178 -> 182 | 0.46428<br>0.16659<br>0.22428 | f=0.2178                |

|    |                     |                                                      |                                          |          |
|----|---------------------|------------------------------------------------------|------------------------------------------|----------|
| 6. | 4.0372 eV 307.10 nm | 175 -> 179<br>178 -> 181                             | 0.42819<br>0.30193                       | f=0.1129 |
| 7. | 4.1060 eV 301.96 nm | 174 -> 179                                           | 0.57495                                  | f=0.1531 |
| 8. | 4.1749 eV 296.97 nm | 174 -> 179<br>175 -> 180<br>176 -> 182<br>177 -> 181 | 0.26022<br>0.11879<br>0.55336<br>0.23847 | f=0.2483 |
| 9. | 4.3962 eV 282.02 nm | 173 -> 179<br>178 -> 185                             | 0.24924<br>0.26249                       | f=0.4607 |

|     |                     |                                                                                                    |                                                                               |          |
|-----|---------------------|----------------------------------------------------------------------------------------------------|-------------------------------------------------------------------------------|----------|
| 10. | 4.4336 eV 279.65 nm | 172 -> 179<br>173 -> 179<br>174 -> 181<br>175 -> 181<br>175 -> 182<br>176 -> 182<br><br>178 -> 185 | 0.10702<br>0.31961<br>0.20361<br>0.13778<br>0.13002<br>0.10137<br><br>0.27320 | f=0.1272 |
| 11. | 4.4496 eV 278.64 nm | 173 -> 179<br>174 -> 180<br><br>177 -> 184<br>178 -> 185                                           | 0.22185<br>0.37536<br><br>0.10956<br>0.17465                                  | f=0.4396 |
| 12. | 4.4834 eV 276.54 nm | 176 -> 181<br>177 -> 184                                                                           | 0.11732<br>0.45436                                                            | f=0.1442 |
| 13. | 4.4962 eV 275.75 nm | 174 -> 182<br>175 -> 180<br>175 -> 181<br><br>176 -> 184<br><br>177 -> 184<br>177 -> 187           | 0.16989<br>0.31371<br>0.38228<br><br>0.12476<br><br>0.13734<br>0.11795        | f=0.3483 |

|     |                     |                          |                    |          |
|-----|---------------------|--------------------------|--------------------|----------|
| 14. | 4.5267 eV 273.89 nm | 169 -> 179               | 0.44056            | f=0.1534 |
| 15. | 4.7507 eV 260.98 nm | 176 -> 184               | 0.61399            | f=0.5237 |
| 16. | 4.9084 eV 252.60 nm | 176 -> 184<br>176 -> 185 | 0.21681<br>0.61972 | f=0.4175 |

**Table S3:** Charge transfer distances and magnitude of charge transfer for each molecule.

| Molecule        | Method  | S <sub>1</sub>         |                 | S <sub>2</sub>         |                 | T <sub>1</sub>         |                 | T <sub>2</sub>         |                 |
|-----------------|---------|------------------------|-----------------|------------------------|-----------------|------------------------|-----------------|------------------------|-----------------|
|                 |         | D <sub>CT</sub><br>(Å) | Q <sub>CT</sub> |
| <b>PrPzPy</b>   | B3LYP   | 4.13                   | 0.79            | 5.15                   | 0.96            | 3.25                   | 0.65            | 1.14                   | 0.37            |
| <b>MePzCzPy</b> |         | 4.57                   | 0.83            | 3.67                   | 0.76            | 3.45                   | 0.61            | 2.71                   | 0.58            |
| <b>PrPzPy</b>   | wB97X-D | 1.16                   | 0.66            | 2.35                   | 0.62            | 1.13                   | 0.51            | 0.71                   | 0.36            |
| <b>MePzCzPy</b> |         | 1.59                   | 0.66            | 1.18                   | 0.52            | 0.21                   | 0.33            | 1.00                   | 0.41            |

**Table S4:** A comparison of HOMO and LUMO energies (in eV),  $\lambda_{max}$  (in nm) of the UV spectrum (for transition to S<sub>1</sub> state) for B3LYP and wB97X-D results against experimental values

| Molecule        | HOMO  |         |       | LUMO  |         |       | $\lambda_{max}(nm)$ |         |      |
|-----------------|-------|---------|-------|-------|---------|-------|---------------------|---------|------|
|                 | B3LYP | wB97X-D | Exp.  | B3LYP | wB97X-D | Exp.  | B3LYP               | wB97X-D | Exp. |
| <b>PrPzPy</b>   | -5.28 | -7.17   | -5.10 | -1.60 | 0.22    | -2.14 | 392.81              | 317.76  | 330  |
| <b>MePzCzPy</b> | -5.43 | -7.33   | -5.10 | -1.58 | 0.21    | -2.04 | 372.59              | 297.97  | 338  |
| <b>y</b>        |       |         |       |       |         |       |                     |         |      |

### 3. Cyclic Voltammetry

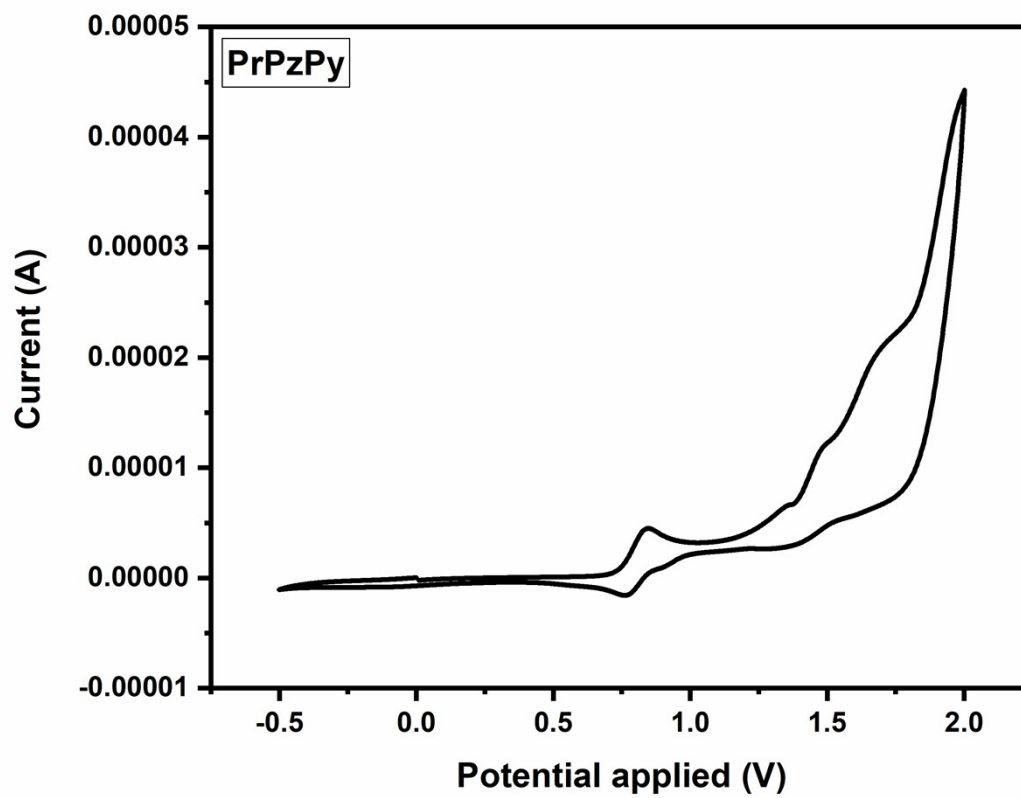

**Fig. S3.** Cyclic Voltammograms of PrPzPy

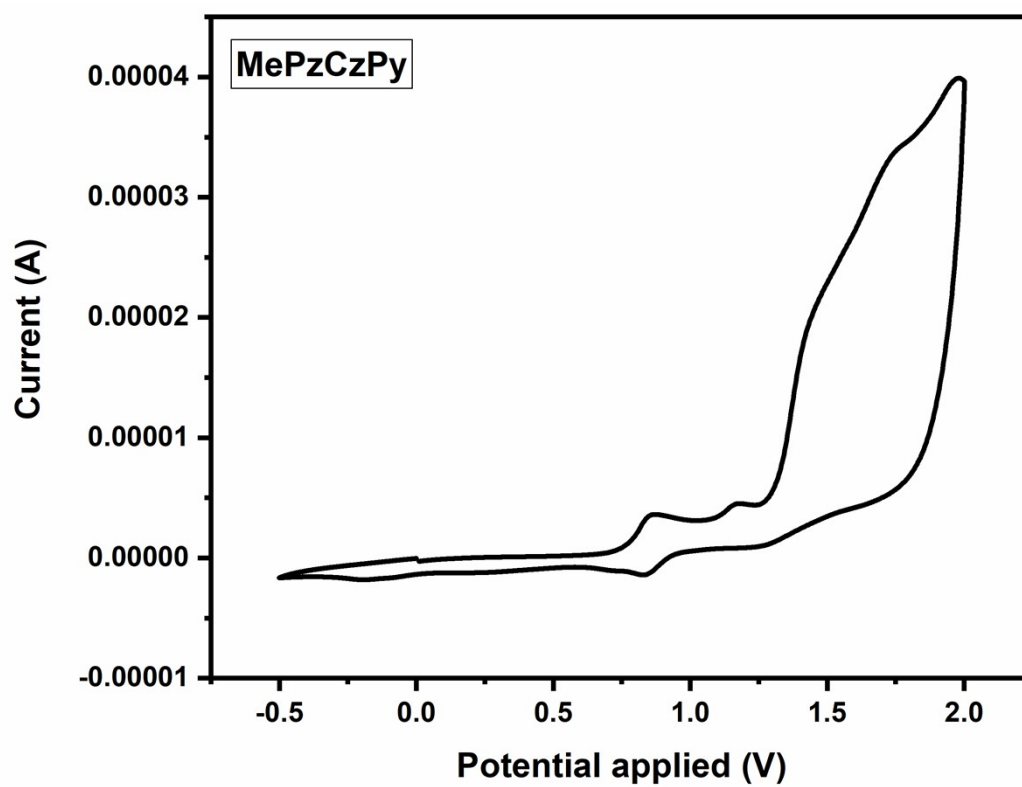

**Fig. S4.** Cyclic Voltammograms of MePzCzPy



#### 4. TGA analysis

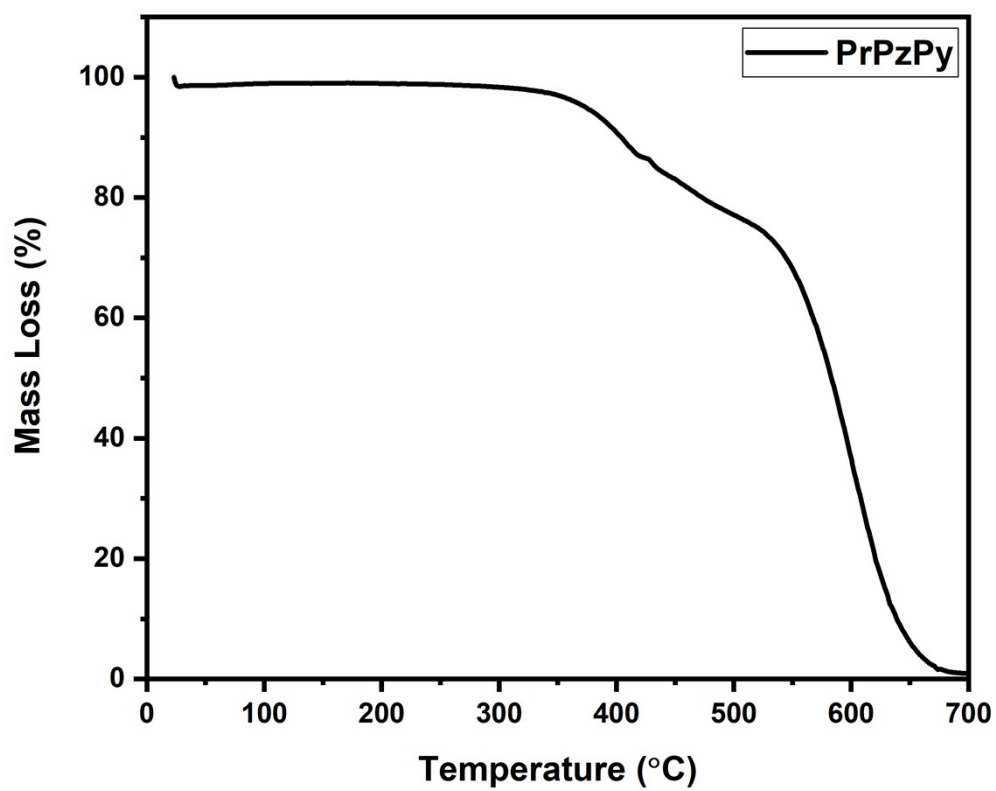

Fig. S5. TGA graph of PrPzPy

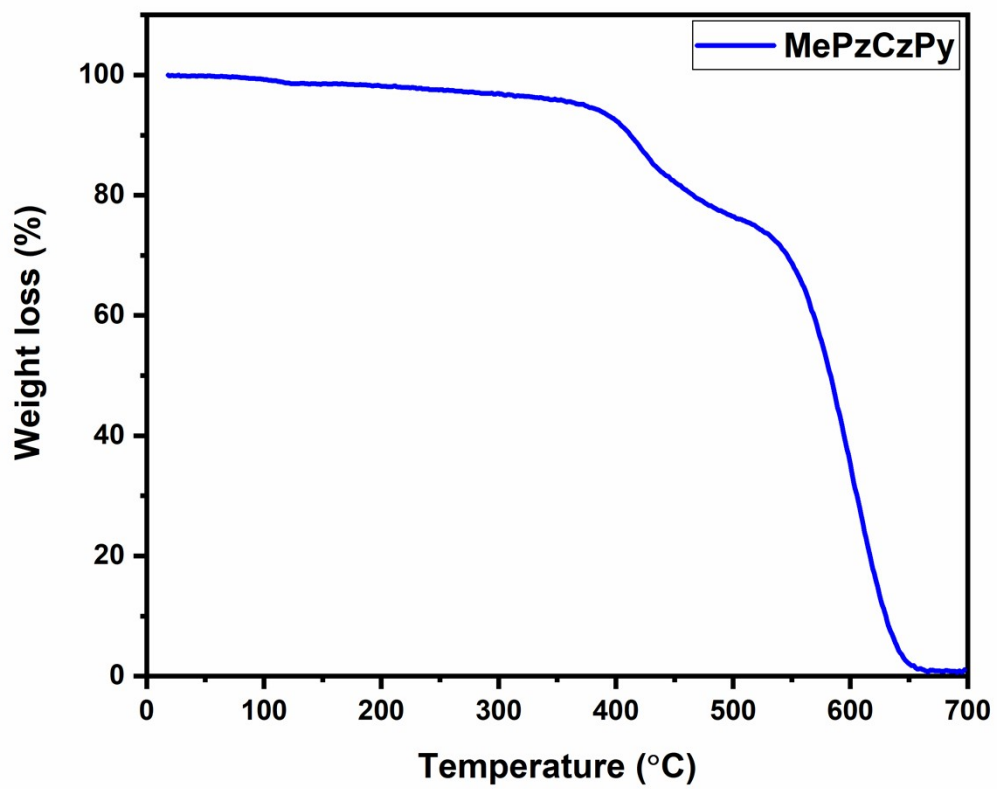

**Fig. S6.** TGA graph of MePzCzPy

## 5. DSC analysis

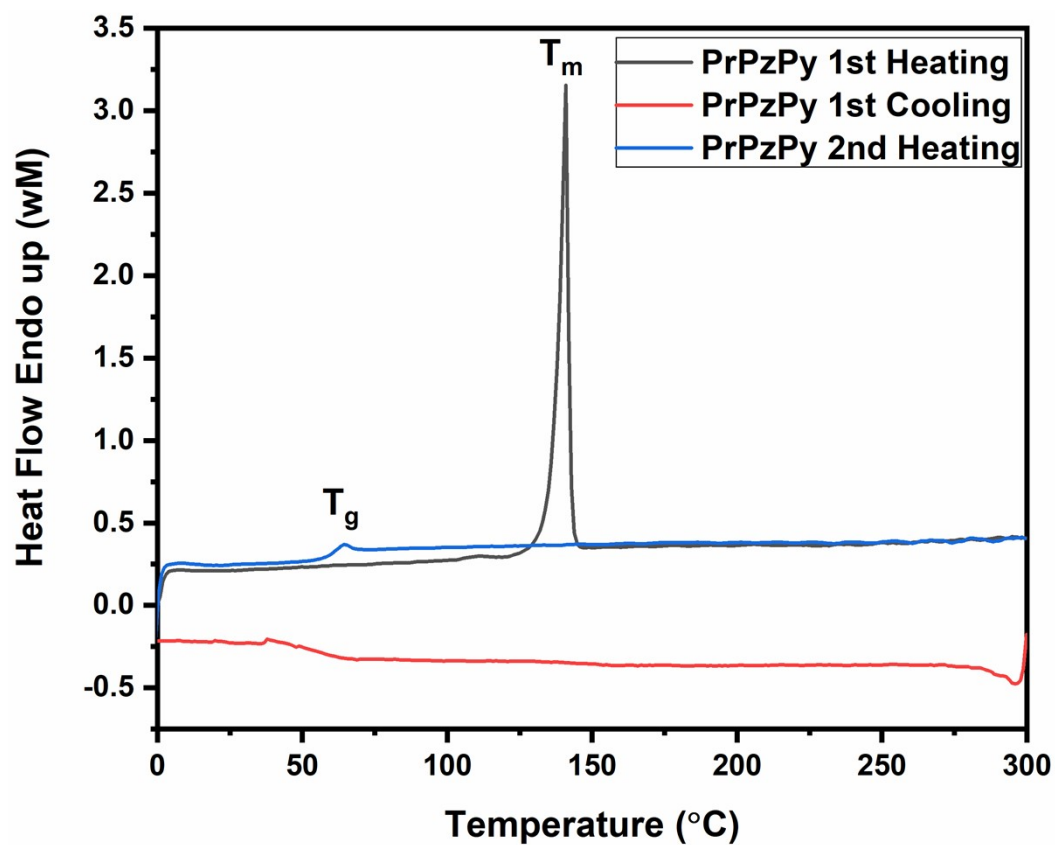

Fig. S7. DSC graph of PrPzPy

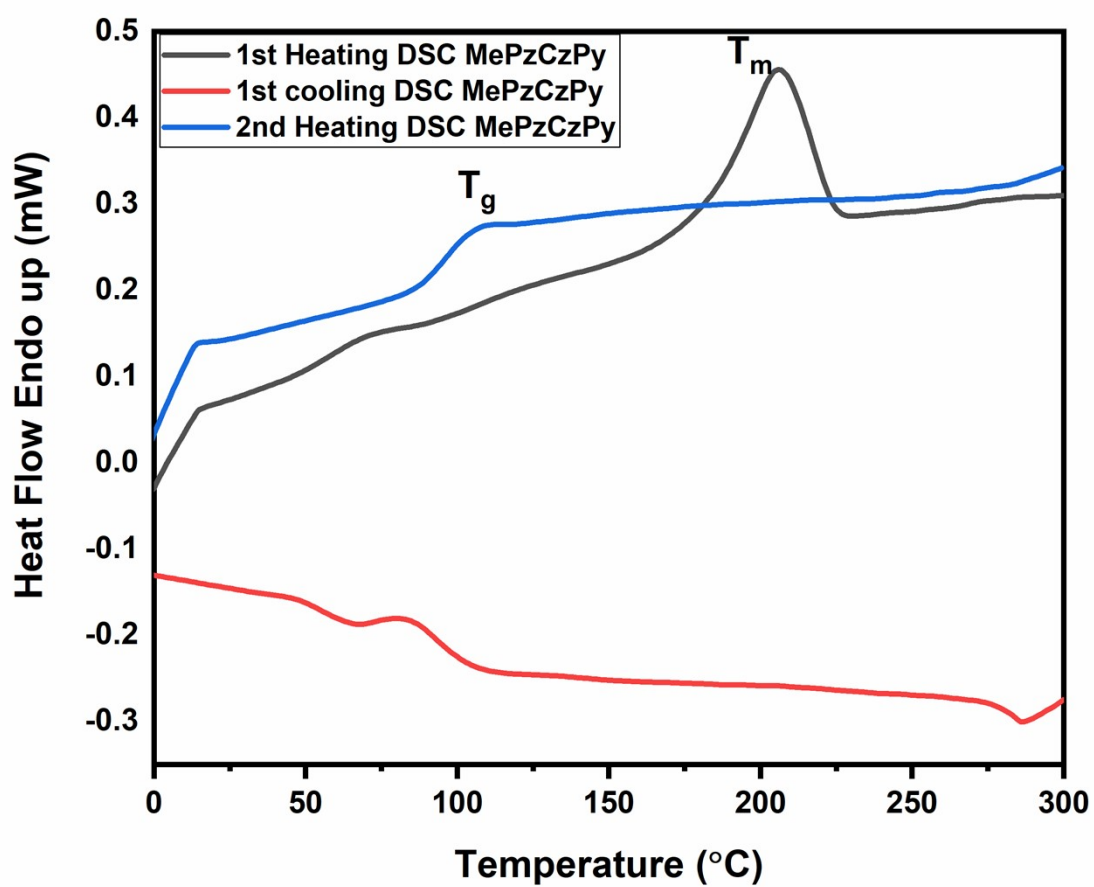

Fig. S8. DSC graph of MePzCzPy

## 6. X-ray analysis

Single-crystal X-ray diffraction data of **PrPzPy** was gathered on an Agilent Supernova X-ray diffractometer equipped with a CCD detector at room temperature (150 or 296 K) using the source graphite-monochromatic Cu K $\alpha$  radiation ( $\lambda = 1.54184\text{\AA}$ ). For single crystal analysis, the same methods and software were used as mentioned in the previous report.<sup>6-10</sup> Crystallographic data have been illustrated in Table S5. CCDC 2192347 contains the supplementary crystallographic data for this paper. These data can be acquired free of cost from The Cambridge Crystallographic Data Centre via [www.ccdc.cam.ac.uk/data\\_request/cif](http://www.ccdc.cam.ac.uk/data_request/cif).

|                                                |                                                                 |
|------------------------------------------------|-----------------------------------------------------------------|
| Identification code                            | <b>PrPzPy</b>                                                   |
| Empirical formula                              | C <sub>34</sub> H <sub>30</sub> N <sub>2</sub> O <sub>2</sub> S |
| Formula weight                                 | 530.66                                                          |
| Temperature/K                                  | 296(2)                                                          |
| Crystal system                                 | Monoclinic                                                      |
| Space group                                    | P2 <sub>1</sub> /c                                              |
| a/ $\text{\AA}$                                | 15.6071(7)                                                      |
| b/ $\text{\AA}$                                | 10.1092(4)                                                      |
| c/ $\text{\AA}$                                | 19.5816(8)                                                      |
| $\alpha/^\circ$                                | 90.00                                                           |
| $\beta/^\circ$                                 | 110.641(5)                                                      |
| $\gamma/^\circ$                                | 90.00                                                           |
| Volume/ $\text{\AA}^3$                         | 2891.2(2)                                                       |
| Z                                              | 4                                                               |
| $\rho_{\text{calc}}/\text{g/cm}^3$             | 1.219                                                           |
| $\mu/\text{mm}^{-1}$                           | 1.245                                                           |
| F(000)                                         | 1120                                                            |
| Radiation                                      | CuK $\alpha$ ( $\lambda = 1.54184$ )                            |
| 2 $\Theta$ range for data collection/ $^\circ$ | 6.04 to 133.74                                                  |

|                                   |                                                   |
|-----------------------------------|---------------------------------------------------|
| Index ranges                      | -18 ≤ h ≤ 18<br>-12 ≤ k ≤ 5<br>-23 ≤ l ≤ 17       |
| Reflections collected             | 9730                                              |
| Independent reflections           | 5084                                              |
| Data/restraints/parameters        | 5084/6/356                                        |
| Goodness-of-fit on F <sup>2</sup> | 1.022                                             |
| Final R indexes [I ≥ 2σ(I)]       | R <sub>1</sub> = 0.0507, wR <sub>2</sub> = 0.1370 |
| Final R indexes [all data]        | R <sub>1</sub> = 0.0643, wR <sub>2</sub> = 0.1530 |
| CCDC No                           | 2192347                                           |

## 7. $^1\text{H}$ and $^{13}\text{C}$ NMR spectra

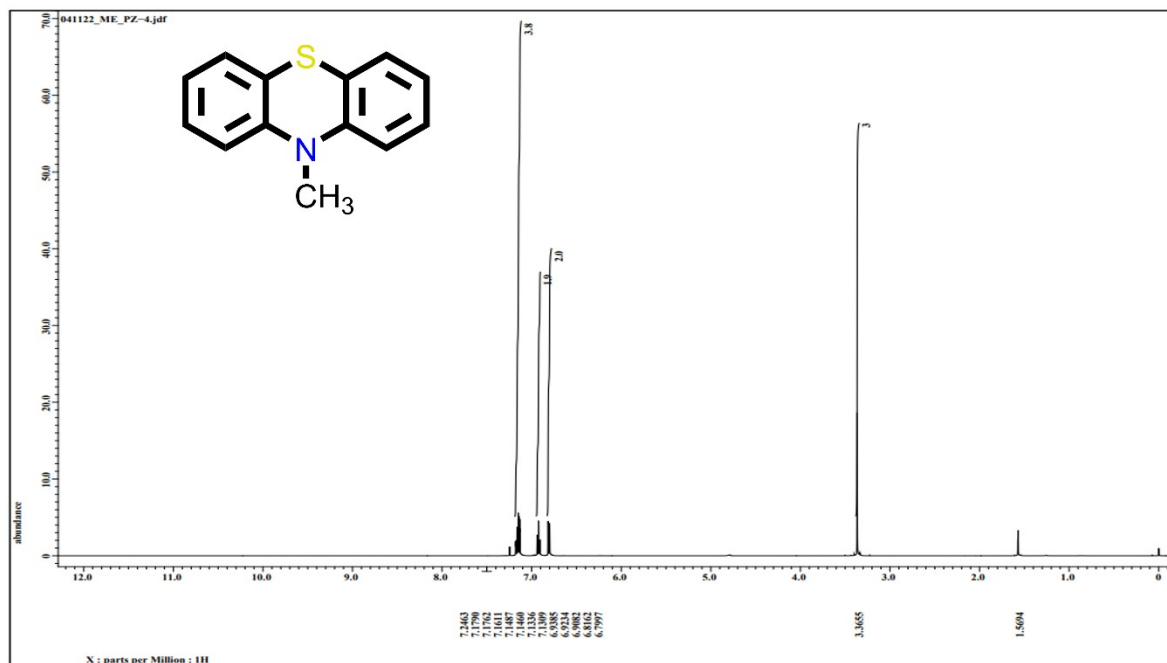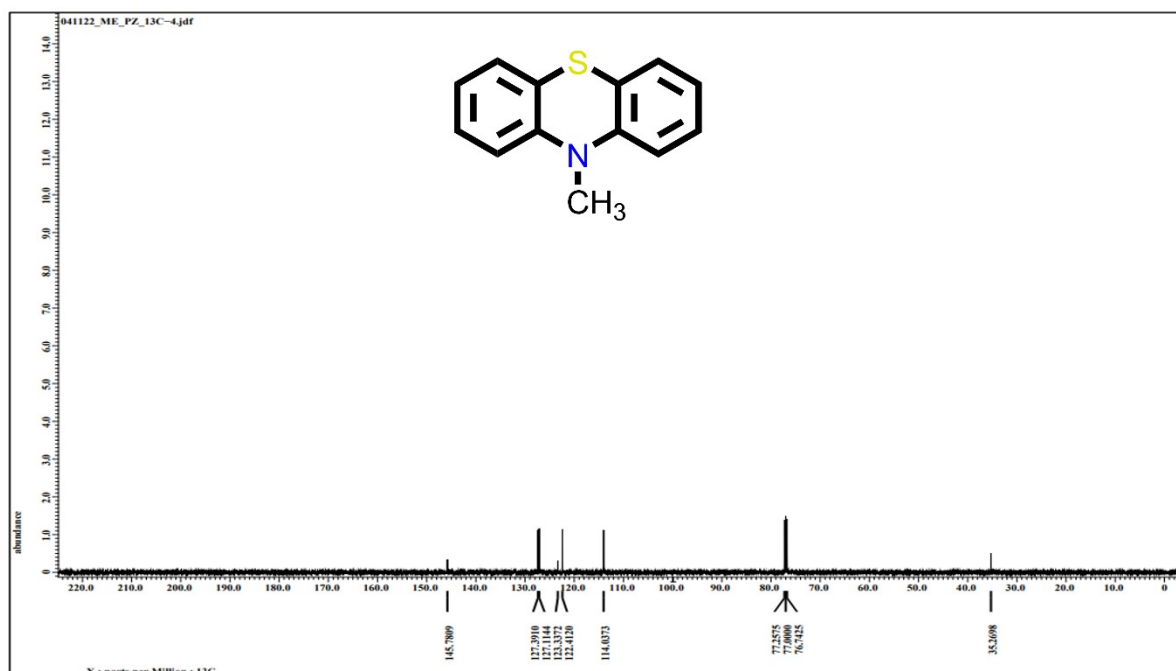

Fig. S9.  $^1\text{H}$  and  $^{13}\text{C}$  NMR spectrum of MePz

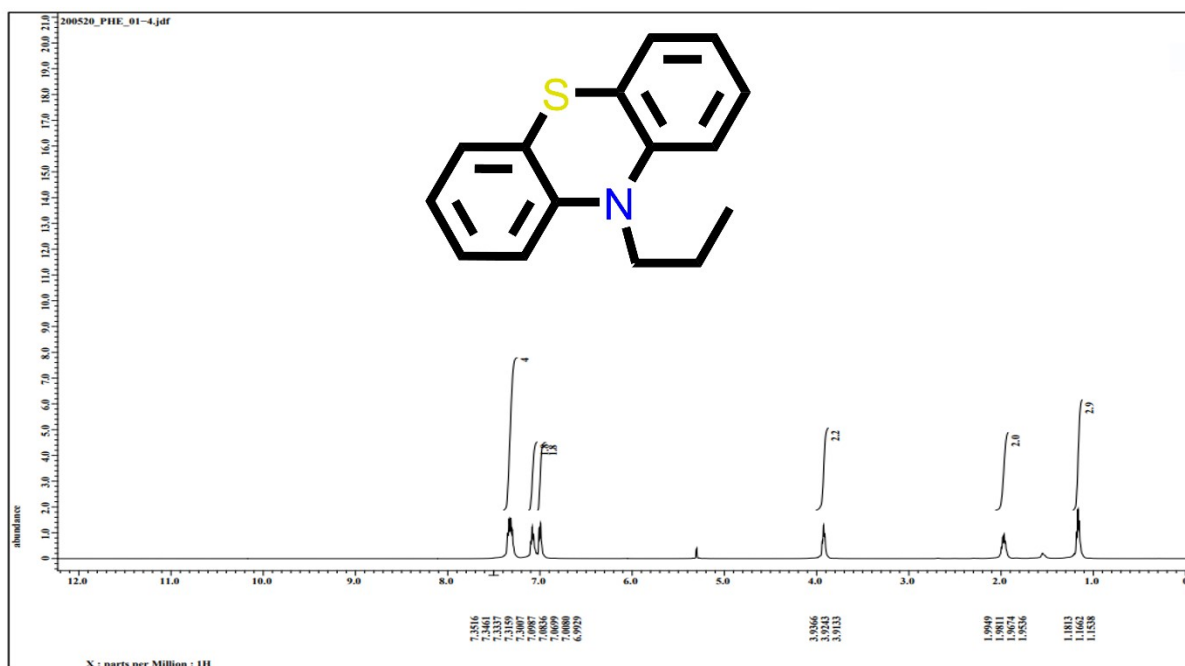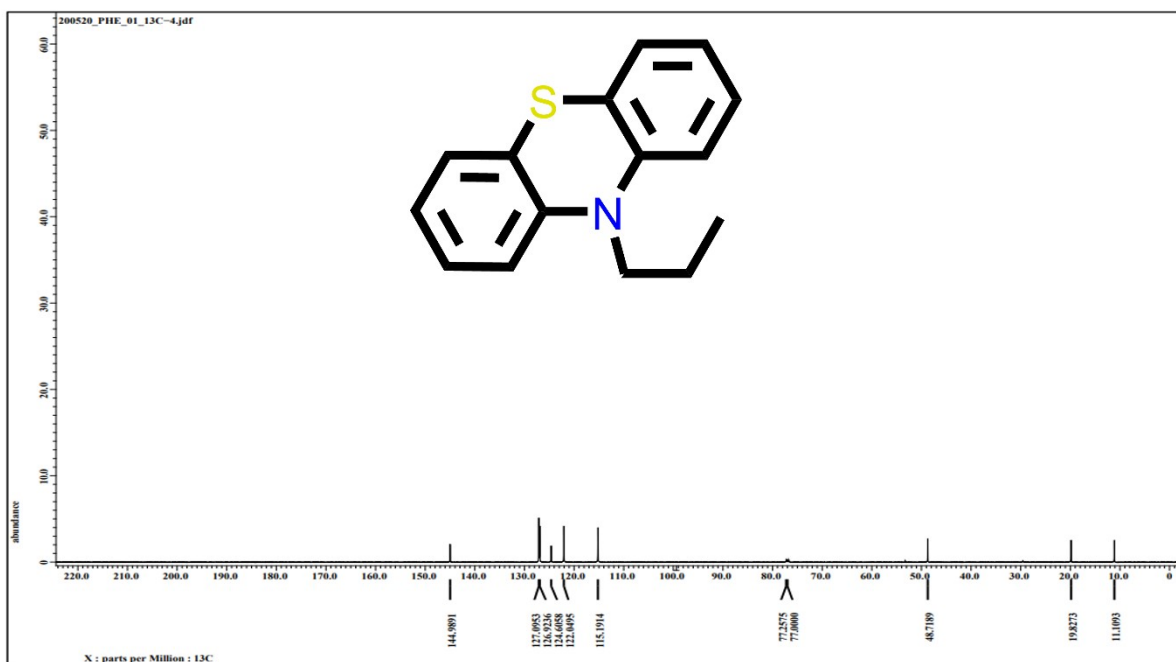

Fig. S10.  $^1\text{H}$  and  $^{13}\text{C}$  NMR spectrum of PrPz



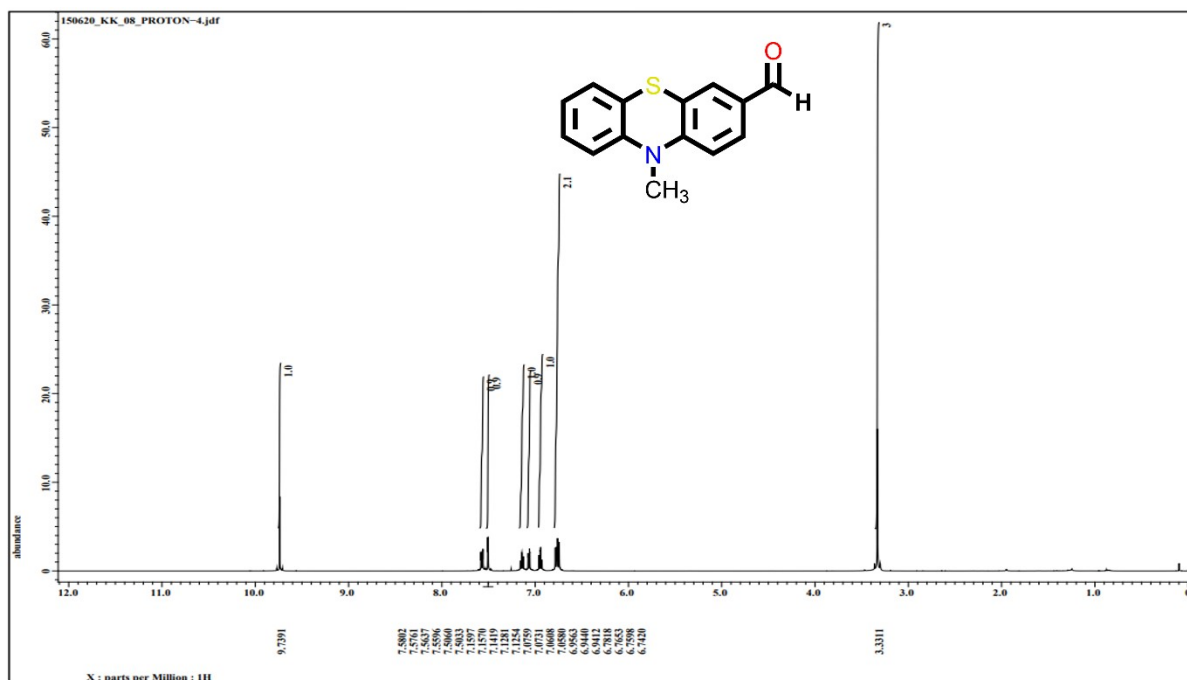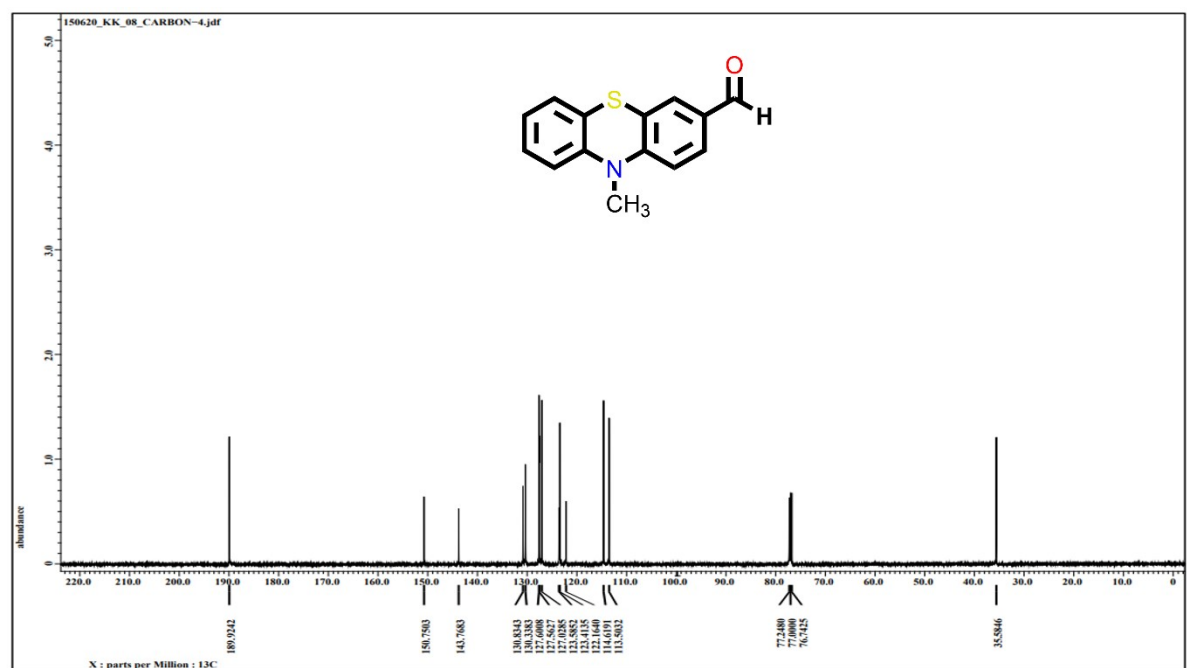

Fig. S11.  $^1\text{H}$  and  $^{13}\text{C}$  NMR spectrum of MePzCHO

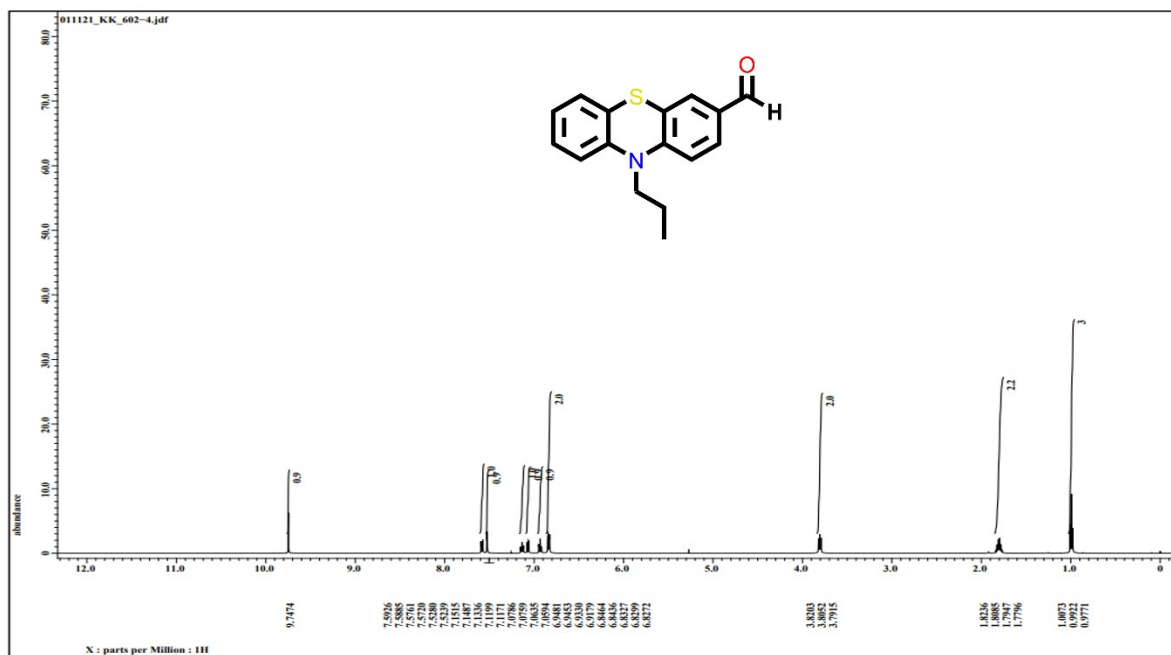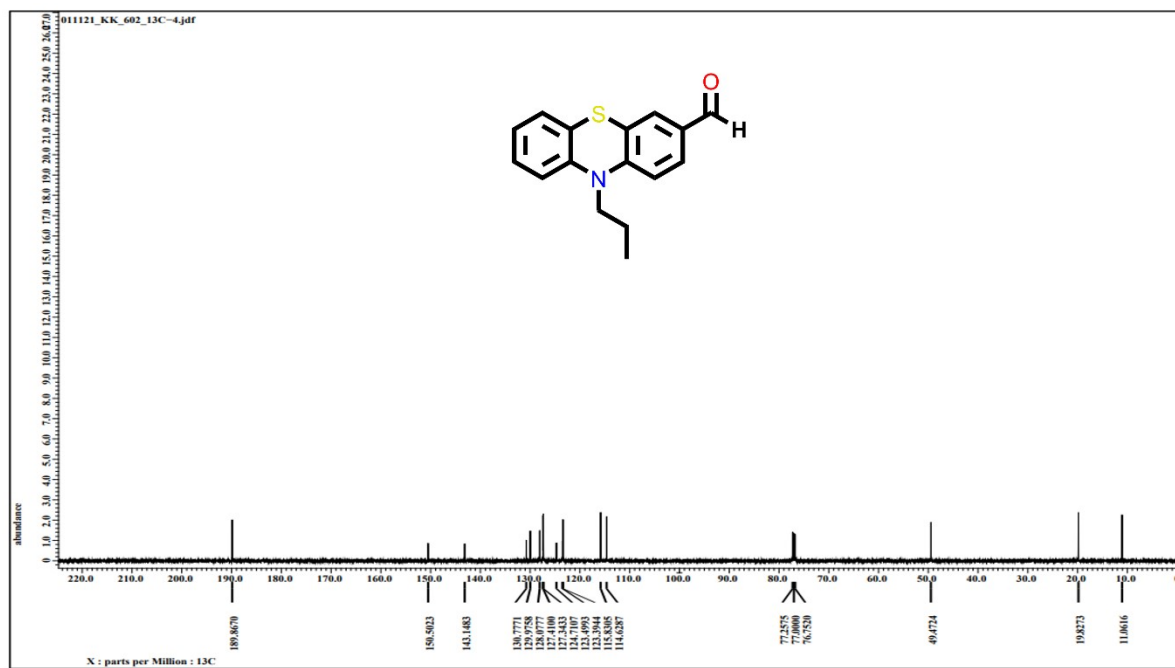

Fig. S12.  $^1\text{H}$  and  $^{13}\text{C}$  NMR spectrum of PrPzCHO

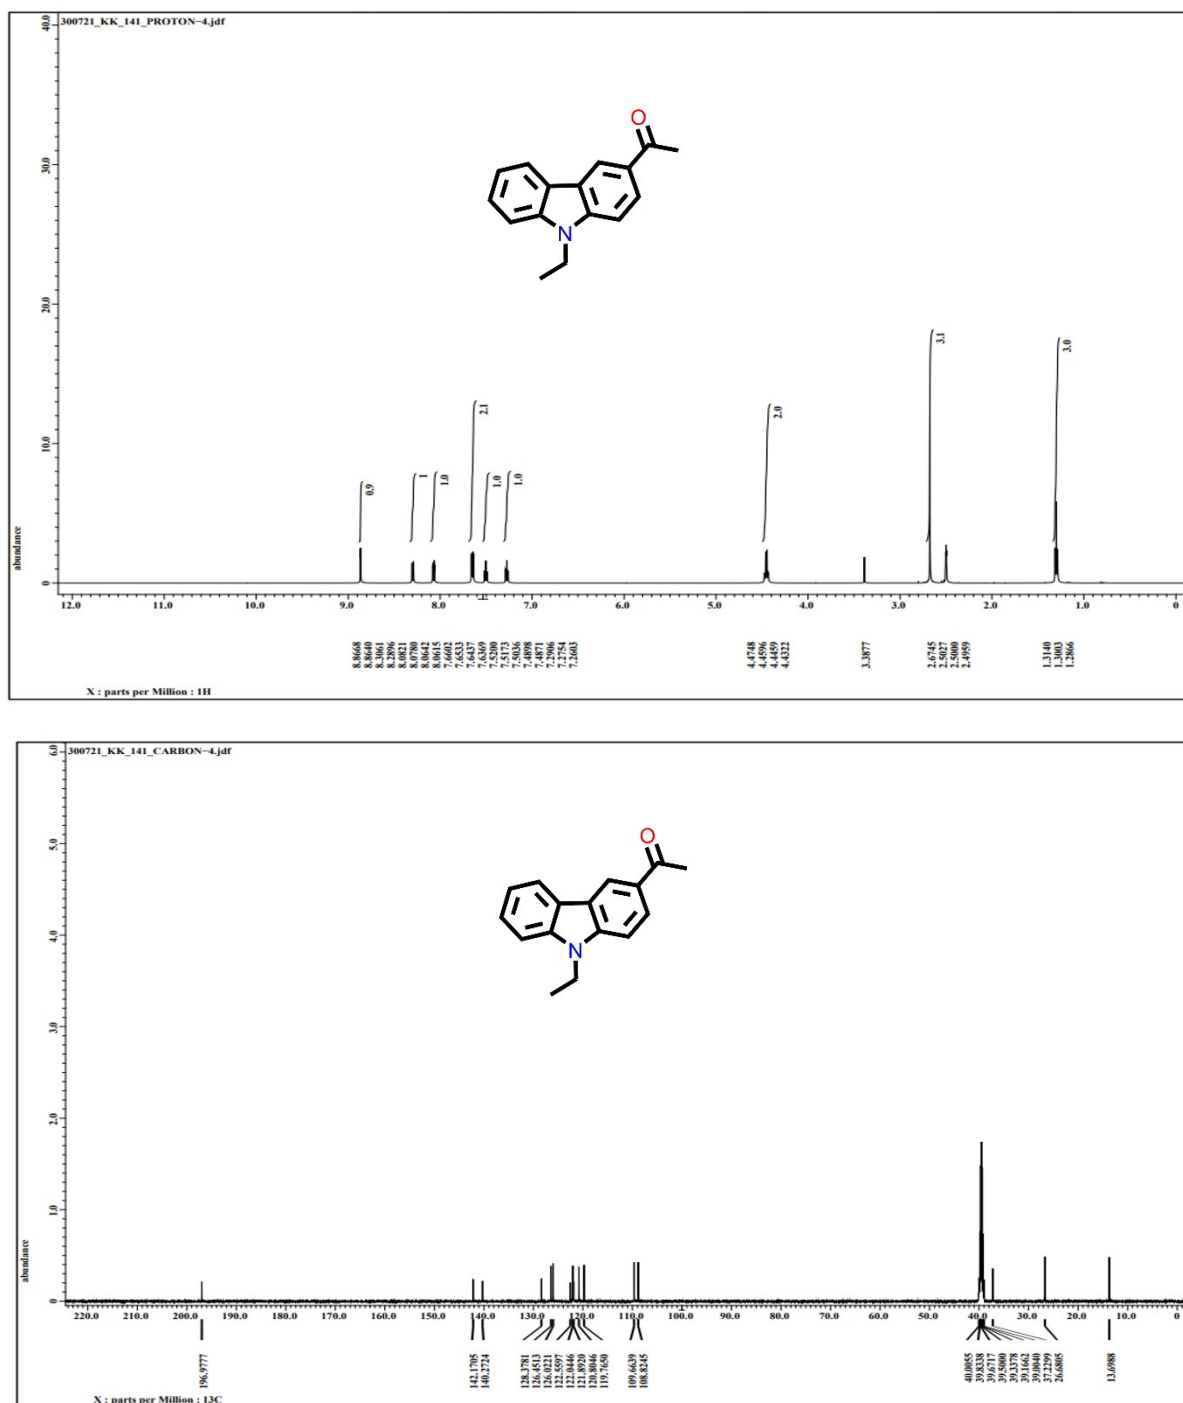





## 8. HRMS spectrum

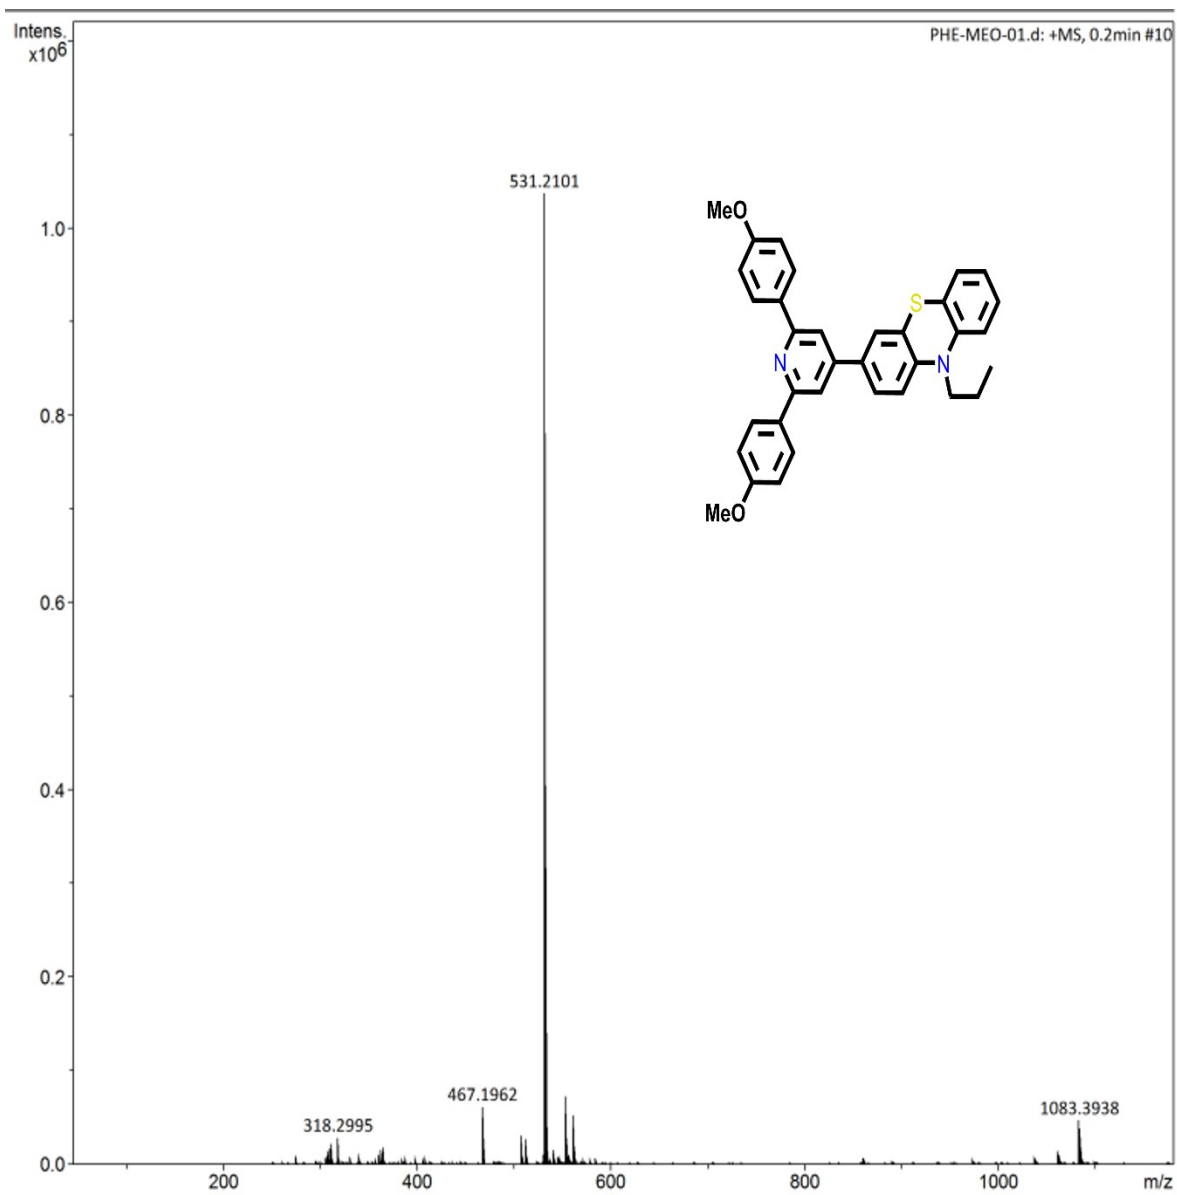

**Fig. S16.** HRMS spectrum of **PrPzPy**

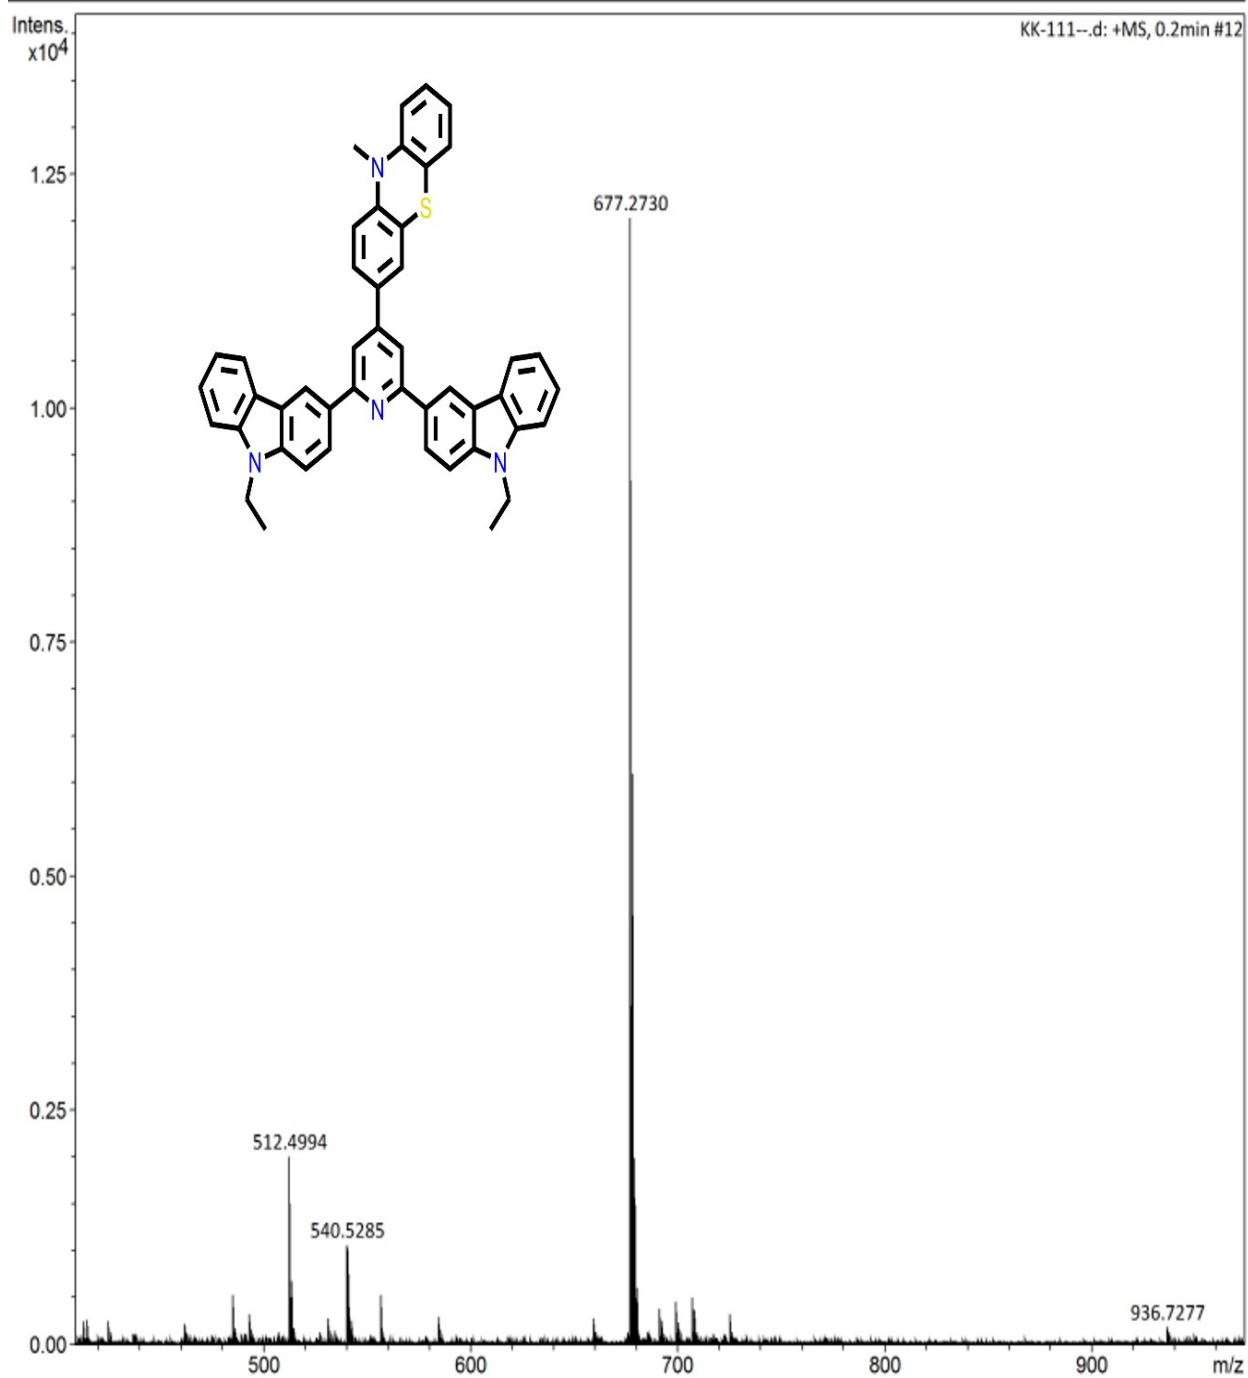

**Fig. S17.** HRMS spectrum MePzCzPy

## 9. Coordinates of the optimized structures:

### 1.1 Coordinates of the optimized structure of PrPzPy with B3LYP functional.

| Atomic No. | X-coordinate | Y-coordinates | Z-coordinates |
|------------|--------------|---------------|---------------|
| 6          | 7.621008647  | -1.688739081  | 2.241225075   |
| 6          | 8.097876672  | -0.596083002  | 1.526995018   |
| 6          | 7.296480592  | 0.039294050   | 0.580424949   |
| 6          | 5.998910513  | -0.417257983  | 0.294429926   |
| 6          | 5.547570475  | -1.550559069  | 0.999782980   |
| 6          | 6.335614514  | -2.155155115  | 1.975818056   |
| 7          | 5.184548447  | 0.220707067   | -0.670302148  |
| 6          | 3.779391342  | 0.182932066   | -0.592291140  |
| 6          | 3.105065287  | -0.889032013  | 0.027923906   |
| 16         | 4.011070354  | -2.329766128  | 0.549212947   |
| 6          | 2.976257285  | 1.195556146   | -1.144574183  |
| 6          | 1.589160179  | 1.153667142   | -1.062259175  |
| 6          | 0.926711127  | 0.111772064   | -0.406234127  |
| 6          | 1.720626186  | -0.905262017  | 0.141923914   |
| 6          | 5.812811522  | 1.169315141   | -1.603702218  |
| 6          | 5.998735514  | 2.616273248   | -1.109457182  |
| 6          | 6.679008584  | 3.479635312   | -2.175966264  |
| 6          | -0.550765987 | 0.076511064   | -0.296418119  |
| 6          | -1.294390041 | 1.252082156   | -0.150899108  |
| 6          | -2.687483149 | 1.184076154   | -0.030942099  |
| 7          | -3.345663201 | 0.015243063   | -0.084959103  |
| 6          | -2.652977151 | -1.124389024  | -0.240516115  |



|   |              |              |              |
|---|--------------|--------------|--------------|
| 6 | -1.256096045 | -1.130915028 | -0.332836122 |
| 6 | -3.441145213 | -2.383650120 | -0.289399118 |
| 6 | -3.514217209 | 2.406314247  | 0.147428915  |
| 6 | -4.719041313 | -2.438667123 | 0.278204925  |
| 6 | -5.480929385 | -3.604062209 | 0.259812924  |
| 6 | -4.970642335 | -4.756438301 | -0.347434123 |
| 6 | -3.696779238 | -4.716212299 | -0.930709167 |
| 6 | -2.948680176 | -3.550812208 | -0.899140166 |
| 6 | -2.994951170 | 3.584236334  | 0.695052959  |
| 6 | -3.779802227 | 4.724456421  | 0.861053968  |
| 6 | -5.122244330 | 4.704255423  | 0.471352940  |
| 6 | -5.659517393 | 3.529927334  | -0.075794102 |
| 6 | -4.869169316 | 2.404434250  | -0.228611114 |
| 8 | -5.624152371 | -5.946959383 | -0.426513129 |
| 6 | -6.929801505 | -6.048794412 | 0.142304914  |
| 8 | -5.978699382 | 5.755212484  | 0.583531949  |
| 6 | -5.491718356 | 6.977240605  | 1.138386990  |
| 1 | 8.234139655  | -2.176228122 | 2.989283131  |
| 1 | 9.096502723  | -0.216067972 | 1.708594034  |
| 1 | 7.699022656  | 0.896572117  | 0.063037909  |
| 1 | 5.943713516  | -3.013268180 | 2.509947097  |
| 1 | 3.427249320  | 2.031498208  | -1.656841224 |
| 1 | 1.020564136  | 1.947894204  | -1.530905215 |
| 1 | 1.256219147  | -1.731816078 | 0.666509953  |
| 1 | 6.782552591  | 0.750805105  | -1.882547238 |

|   |              |              |              |
|---|--------------|--------------|--------------|
| 1 | 5.213118452  | 1.168680138  | -2.516927289 |
| 1 | 5.032139441  | 3.050844284  | -0.843973163 |
| 1 | 6.591043556  | 2.627689247  | -0.191452111 |
| 1 | 6.087738524  | 3.513920314  | -3.096153334 |
| 1 | 6.807080591  | 4.506002389  | -1.824566234 |
| 1 | 7.668841667  | 3.088964281  | -2.431308284 |
| 1 | -0.791519003 | 2.208997228  | -0.121360106 |
| 1 | -0.722908003 | -2.065453099 | -0.440761130 |
| 1 | -5.116933338 | -1.548328053 | 0.747621961  |
| 1 | -6.459698429 | -3.603074208 | 0.719937958  |
| 1 | -3.317892207 | -5.610213366 | -1.411431205 |
| 1 | -1.977437101 | -3.548376209 | -1.379162204 |
| 1 | -1.964668091 | 3.622219338  | 1.028344983  |
| 1 | -3.338834195 | 5.609187503  | 1.299376002  |
| 1 | -6.700879427 | 3.527552338  | -0.375622125 |
| 1 | -5.290750347 | 1.500817180  | -0.649263146 |
| 1 | -7.628037550 | -5.356538335 | -0.338000122 |
| 1 | -7.252316517 | -7.071919464 | -0.040002099 |
| 1 | -6.909682504 | -5.860747361 | 1.220121999  |
| 1 | -4.678071294 | 7.391675610  | 0.535248944  |
| 1 | -6.335786443 | 7.663858669  | 1.127226991  |
| 1 | -5.150281331 | 6.837733607  | 2.168664068  |

**1.2** Coordinates of the optimized structure of **MePzCzPy** with B3LYP functional.

| <b>Atomic No.</b> | <b>X-coordinate</b> | <b>Y-coordinates</b> | <b>Z-coordinates</b> |
|-------------------|---------------------|----------------------|----------------------|
| 6                 | 10.064860205        | 0.898319847          | 0.281374249          |

|    |              |              |              |
|----|--------------|--------------|--------------|
| 6  | 10.285734872 | -0.309343753 | 0.935408493  |
| 6  | 9.336768826  | -1.329397085 | 0.881483231  |
| 6  | 8.158024228  | -1.173137092 | 0.139234912  |
| 6  | 7.949410121  | 0.050551773  | -0.523158389 |
| 6  | 8.882737445  | 1.079450440  | -0.435384333 |
| 7  | 7.193767023  | -2.202755773 | 0.042278249  |
| 6  | 5.826359148  | -1.869858747 | 0.076729240  |
| 6  | 5.362621862  | -0.715012683 | -0.581923478 |
| 16 | 6.510689843  | 0.235651099  | -1.563458855 |
| 6  | 4.881103412  | -2.659211568 | 0.746995542  |
| 6  | 3.531252907  | -2.323858854 | 0.736857729  |
| 6  | 3.071154413  | -1.168780502 | 0.094541164  |
| 6  | 4.020290516  | -0.361678518 | -0.550680192 |
| 6  | 1.634695024  | -0.800688073 | 0.099999479  |
| 6  | 0.636392026  | -1.776958263 | 0.025639693  |
| 6  | -0.710727200 | -1.394451813 | 0.017325354  |
| 7  | -1.079050636 | -0.106881555 | 0.113019159  |
| 6  | -0.137278204 | 0.846109208  | 0.201935109  |
| 6  | 1.227967856  | 0.534676681  | 0.180276004  |
| 6  | -0.615653389 | 2.250885417  | 0.302472940  |
| 6  | -1.804833087 | -2.397433478 | -0.077782656 |
| 6  | -1.885927151 | 2.586272465  | -0.178400580 |
| 6  | -2.336180397 | 3.902280243  | -0.097189473 |
| 6  | -1.509047162 | 4.899223060  | 0.485634168  |
| 6  | -0.241087852 | 4.579437475  | 0.978562459  |

|   |              |              |              |
|---|--------------|--------------|--------------|
| 6 | 0.185642258  | 3.261837450  | 0.879186893  |
| 6 | -1.596472900 | -3.656861858 | -0.683559028 |
| 6 | -2.604789975 | -4.606128250 | -0.785313357 |
| 6 | -3.860254097 | -4.290595631 | -0.258662804 |
| 6 | -4.099126655 | -3.029324312 | 0.349360490  |
| 6 | -3.071568034 | -2.091958826 | 0.431431669  |
| 6 | 7.586514334  | -3.553608952 | 0.431613397  |
| 6 | -3.558548711 | 4.566765749  | -0.498275830 |
| 6 | -3.412289781 | 5.932145331  | -0.137119882 |
| 7 | -2.173047555 | 6.114553787  | 0.466636104  |
| 7 | -5.018862421 | -5.048176089 | -0.213884895 |
| 6 | -6.015635636 | -4.296296590 | 0.398235024  |
| 6 | -5.483556803 | -3.034262943 | 0.773100555  |
| 6 | -4.738495874 | 4.136155547  | -1.112134290 |
| 6 | -5.747799451 | 5.060087027  | -1.360286177 |
| 6 | -5.587213524 | 6.408082586  | -1.000813717 |
| 6 | -4.423291753 | 6.863477551  | -0.388645311 |
| 6 | -7.347295896 | -4.630413374 | 0.658935283  |
| 6 | -8.138447898 | -3.686061742 | 1.306303599  |
| 6 | -7.625269953 | -2.435269175 | 1.685986053  |
| 6 | -6.300584885 | -2.104048758 | 1.422326155  |
| 6 | -5.186155379 | -6.380575635 | -0.784170959 |
| 6 | -5.621570039 | -6.365073705 | -2.251826755 |
| 6 | -1.633838635 | 7.387080076  | 0.933767859  |
| 6 | -0.868352195 | 8.157735298  | -0.145153472 |

|   |              |              |              |
|---|--------------|--------------|--------------|
| 1 | 10.796873739 | 1.695400656  | 0.329346611  |
| 1 | 11.194155940 | -0.463035458 | 1.506245068  |
| 1 | 9.519110235  | -2.248003391 | 1.422176843  |
| 1 | 8.688593267  | 2.016291348  | -0.944849741 |
| 1 | 5.196195734  | -3.538905704 | 1.291266371  |
| 1 | 2.835005531  | -2.956099558 | 1.274698705  |
| 1 | 3.704293909  | 0.532265776  | -1.075299309 |
| 1 | 0.906430509  | -2.822427327 | -0.033731583 |
| 1 | 1.967276178  | 1.322007368  | 0.233376402  |
| 1 | -2.502878623 | 1.811609895  | -0.615449783 |
| 1 | 0.398262807  | 5.326129852  | 1.433072015  |
| 1 | 1.158417899  | 3.008654982  | 1.282521664  |
| 1 | -0.629905212 | -3.889338891 | -1.113643985 |
| 1 | -2.414123073 | -5.553796986 | -1.273623718 |
| 1 | -3.234507424 | -1.124102189 | 0.888195749  |
| 1 | 7.604107520  | -3.706579950 | 1.518263615  |
| 1 | 6.890803999  | -4.266247725 | -0.009970697 |
| 1 | 8.579396007  | -3.761403919 | 0.034358553  |
| 1 | -4.864454019 | 3.096018113  | -1.391864009 |
| 1 | -6.667185759 | 4.740149786  | -1.836688806 |
| 1 | -6.385477722 | 7.112552074  | -1.205896132 |
| 1 | -4.313358174 | 7.907639515  | -0.122512736 |
| 1 | -7.760667096 | -5.588542870 | 0.368397733  |
| 1 | -9.174858104 | -3.923111612 | 1.518999012  |
| 1 | -8.270161650 | -1.723178148 | 2.187597395  |

|   |              |              |              |
|---|--------------|--------------|--------------|
| 1 | -5.906700213 | -1.137136523 | 1.715502152  |
| 1 | -4.239328436 | -6.912966631 | -0.670812582 |
| 1 | -5.916779294 | -6.915129537 | -0.173721472 |
| 1 | -6.579473731 | -5.853871549 | -2.370738926 |
| 1 | -4.882244053 | -5.856595912 | -2.874689888 |
| 1 | -5.732008008 | -7.388719573 | -2.618915536 |
| 1 | -2.466500439 | 7.983234708  | 1.312876446  |
| 1 | -0.986785852 | 7.181375333  | 1.789057874  |
| 1 | -1.513887594 | 8.386241601  | -0.996112728 |
| 1 | -0.494719101 | 9.100059852  | 0.263806336  |
| 1 | -0.015023966 | 7.580263904  | -0.507651940 |

## 10. References

1. K. Kumar, K. K. Kesavan, S. Kumar, S. Banik, J. Jayakumar, L. Y. Hong, L. Y. Hung, M. R. Nagar, J-H. Jou, S. Ghosh. Decorated pyridine as hole transporting material (HTM) for solution-processed OLEDs. *Journal of Photochemistry and Photobiology A: Chemistry* 2023, **437**, 114380.
2. P. Dao, F. Ye, Y. Liu, Z. Y. Du, K. Zhang, C. Z. Dong, B. Meunier and H. Chen, Development of Phenothiazine-Based Theranostic Compounds That Act Both as Inhibitors of  $\beta$ -Amyloid Aggregation and as Imaging Probes for Amyloid Plaques in Alzheimer's Disease. *ACS Chem. Neurosci.* 2017, **8**, 798–806.
3. T. Miyazaki, M. Shibahara, J. I. Fujishige, M. Watanabe, K. Goto and T. Shinmyozu, Solvent assisted photochemical formation of a new keto [3, 3] paracyclophane. *J. Org. Chem.*, 2014, **79**, 11440–11453.

4. S. Liu, N. Giacoletto, M. Schmitt, M. Nechab, B. Graff, F. Morlet-Savary, P. Xiao, F. Dumur and J. Lalevée, Effect of decarboxylation on the photoinitiation behavior of nitrocarbazole-based oxime esters. *Macromolecules*, 2022, **55**, 2475–2485.
5. Q. Ran, J. Ma, T. Wang, S. Fan, Y. Yang, S. Qi, Y. Cheng and F. Song, Synthesis and fluorescence study of conjugated polymers based on 2, 4, 6-triphenylpyridine moieties. *New J. Chem.*, 2016, **40**, 6281–6288.
6. Karmakar, A.; Soliman, M. M. A.; Rúbio, G. M. D. M.; Guedes, M. F. C.; Pombeiro, A. J. L. Synthesis and catalytic activities of a Zn(II) based metallomacrocyclic and a metal–organic framework towards one-pot deacetalization-Knoevenagel tandem reactions under different strategies: a comparative study : *Dalton Trans.*, **2020**, *49*, 8075–8085.
7. Crys AlisPro Program, ver. 171.37.33c. Data Collection and Processing Software for Agilent X-ray Diffractometers; Agilent Technologies: Oxford, UK, **2012**, 1–49
8. G. M. Sheldrick, SADABS. Program for Empirical Absorption Correction. University of Gottingen, Germany, **1996**.
9. G. M. Sheldrick, Crystal structure refinement with *SHELXL*. *Acta Crystallogr.* **2015**, *C71*, 3–8.
10. L. J. Farrugia, WinGX and ORTEP for Windows: an update. *J. Appl. Crystallogr.* **2012**, *45*, 849–854.
